# Supplementary material for: A natural deep eutectic solvent-based aqueous biphasic system coupled with MoS2 photocatalytic reduction for green recovery of gold from thiosulfate solution
Source: Royal Society of Chemistry journal article supplement (doi:10.1039/d2gc02917k), 2022-01-01
Supplement: d2gc02917k1.pdf [file d2gc02917k1.pdf]

## Supplementary material

### **Natural deep eutectic solvent-based aqueous biphasic system coupled with MoS<sub>2</sub> photocatalytic reduction for green recovery of gold from thiosulfate solution**

Guiping Zhu,<sup>a</sup> Junhui Yu,<sup>a</sup> Ru Zhang,<sup>a</sup> Ding Chen,<sup>a</sup> Xiaoyu Ma,<sup>a</sup> Lingling Zhao,<sup>a</sup> Qilan Huang,<sup>a</sup> Xiangjun Yang,<sup>\*a</sup> Shixiong Wang,<sup>\*a</sup>

<sup>a</sup> Research Center of Lake Restoration Technology Engineering for Universities of Yunnan Province, School of Chemical Science and Technology, Yunnan University, Kunming, China.

\*Corresponding Author at: School of Chemical Science and Technology, Yunnan University, No. 2, CuiHu North Road, Kunming, Yunnan Province 650091, China.

E-mail: yxjun@ynu.edu.cn (X. Yang); wangshixiong@ynu.edu.cn (S. Wang)

Number of pages in Supporting Information: 29

Number of tables in Supporting Information: 7

Number of figures in Supporting information: 9

Number of texts in Supporting information: 7

## Contents

|                                                                                                                                               |    |
|-----------------------------------------------------------------------------------------------------------------------------------------------|----|
| <b>Table S1.</b> Chemicals.....                                                                                                               | 3  |
| <b>Table S2.</b> Preparation of NADESs <sup>a</sup> .....                                                                                     | 4  |
| <b>Fig. S1.</b> (a)~(c) represent <sup>1</sup> H NMR spectra of Bet-Lac, ChCl-Lac and ChCl-Xyl.....                                           | 6  |
| <b>Table S3.</b> <sup>1</sup> H NMR data of Bet-Lac, ChCl-Lac and ChCl-Xyl.....                                                               | 6  |
| <b>Fig. S2.</b> FT-IR spectra of pure substances ChCl-Lac (a), Bet-Lac (b) and ChCl-Xyl (c). ....                                             | 7  |
| <b>TEXT S1.</b> FT-IR analysis of NADESs .....                                                                                                | 8  |
| <b>TEXT S2.</b> Preparation of the stock solution of Au(S <sub>2</sub> O <sub>3</sub> ) <sub>2</sub> <sup>3-</sup> .....                      | 8  |
| <b>Table S4.</b> Distribution ratio of NADES + K <sub>3</sub> PO <sub>4</sub> + water system at extraction equilibrium <sup>c</sup> .....     | 9  |
| <b>TEXT S3.</b> Preparation of MoS <sub>2</sub> .....                                                                                         | 10 |
| <b>Table S5.</b> Fitting parameters of NADES + K <sub>3</sub> PO <sub>4</sub> + water system.....                                             | 10 |
| <b>Table S6.</b> Tie-line data of NADES + K <sub>3</sub> PO <sub>4</sub> + water system <sup>e</sup> .....                                    | 10 |
| <b>Fig. S3.</b> Effects of temperature on extraction of Au(S <sub>2</sub> O <sub>3</sub> ) <sub>2</sub> <sup>3-</sup> .....                   | 11 |
| <b>Table S7.</b> Thermodynamic parameters of extraction of Au(S <sub>2</sub> O <sub>3</sub> ) <sub>2</sub> <sup>3-</sup> by NADES-ATPSs ..... | 11 |
| <b>Fig. S4.</b> FT-IR spectra of Bet-Lac (a) and ChCl-Xyl (b) before and after loaded with Au(I).....                                         | 12 |
| <b>Fig. S5.</b> Wide scanning XPS spectra (a) and S 2p spectra (b) of the NADES-rich phase with or without Au(I) loaded.....                  | 13 |
| <b>Fig. S6.</b> Effects of ClO <sub>4</sub> <sup>-</sup> content on extraction efficiency. ....                                               | 14 |
| <b>TEXT S4.</b> Characterization of MoS <sub>2</sub> .....                                                                                    | 14 |
| <b>Fig. S7.</b> XRD patterns of MoS <sub>2</sub> that were synthesized using a microwave-assisted method.....                                 | 15 |
| <b>Fig. S8.</b> Wide scanning XPS spectra (a) and Mo 3d spectra (b) of sediments before and after reduction .....                             | 16 |
| <b>TEXT S5.</b> Mechanism of gold recovery from NADES-rich phase by MoS <sub>2</sub> .....                                                    | 16 |
| <b>Fig. S9.</b> Diffuse reflection absorption curve of MoS <sub>2</sub> (a) and Tauc plots of MoS <sub>2</sub> (b) .....                      | 17 |
| <b>TEXT S6.</b> Construction of a cyclic model .....                                                                                          | 17 |
| <b>TEXT S7.</b> The calculation details .....                                                                                                 | 18 |

## 2. Material and methods

### 2.1. Chemicals

**Table S1.** Chemicals

| Reagent                             | Content | Manufacturer (Company)    |
|-------------------------------------|---------|---------------------------|
| Betaine hydrochloride               | 99.0%   | Adamas Chemical reagent   |
| Choline chloride                    | 99.0%   | Adamas Chemical reagent   |
| Acetic acid glacial                 | 99.0%   | Adamas Chemical reagent   |
| Propionic acid                      | 99.0%   | Adamas Chemical reagent   |
| Malonic acid                        | 99.0%   | Adamas Chemical reagent   |
| Butyric acid                        | 99.0%   | Adamas Chemical reagent   |
| Ethylene glycol                     | 99.0%   | Adamas Chemical reagent   |
| D-(+)-glucose                       | 99.0%   | Adamas Chemical reagent   |
| D-(-)-fructose                      | 99.0%   | Adamas Chemical reagent   |
| Potassium phosphate tribasic        | 99.0%   | Adamas Chemical reagent   |
| Sodium thiosulfate                  | 99.0%   | Adamas Chemical reagent   |
| Thiourea                            | 99.0%   | Adamas Chemical reagent   |
| Molybdenum (IV) sulfide             | 99.0%   | Adamas Chemical reagent   |
| Itaconic acid                       | 99.0%   | Adamas Chemical reagent   |
| DL-Malic acid                       | 99.8%   | Adamas Chemical reagent   |
| Sorbic acid                         | 99.8%   | Adamas Chemical reagent   |
| 2-Propanol                          | 99.8%   | Adamas Chemical reagent   |
| 1,3-Propanediol                     | 99.8%   | Adamas Chemical reagent   |
| Cupric chloride anhydrous           | 99.8%   | Adamas Chemical reagent   |
| Dimethyl sulfoxide-d <sub>6</sub>   | 99.8%   | Adamas Chemical reagent   |
| Cobalt chloride                     | 99.8%+  | Adamas Chemical reagent   |
| Methyl alcohol                      | 99.9%   | Adamas Chemical reagent   |
| 1-Butanol                           | 99.9%   | Adamas Chemical reagent   |
| Xylitol                             | 99.9%+  | Adamas Chemical reagent   |
| Ammonium molybdate(VI) Tetrahydrate | 99.9%+  | Adamas Chemical reagent   |
| Lithium hydroxide                   | 99.9%+  | Adamas Chemical reagent   |
| Gold                                | 99.99%  | Adamas Chemical reagent   |
| Lactic acid                         | ≥80.0%  | Greagent Chemical reagent |
| Sodium hydroxide                    | ≥96.0%  | Greagent Chemical reagent |
| Sodium sulfide nonahydrate          | ≥98.0%  | Greagent Chemical reagent |
| Ammonium citrate tribasic           | ≥98.5%  | Greagent Chemical reagent |
| Ammonium dihydrogen phosphate       | ≥99.0%  | Greagent Chemical reagent |
| Sodium citrate dihydrate            | ≥99.0%  | Greagent Chemical reagent |
| Glycerol                            | ≥99.0%  | Greagent Chemical reagent |
| Oxalic acid                         | ≥99.0%  | Greagent Chemical reagent |

|                                 |               |                                        |
|---------------------------------|---------------|----------------------------------------|
| 1-Propanol                      | ≥99.5%        | Greagent Chemical reagent              |
| N,N-Dimethylformamide           | ≥99.5%        | Greagent Chemical reagent              |
| Ethanol                         | ≥99.7%        | Greagent Chemical reagent              |
| Nickel(II) chloride hexahydrate | ≥98.0%        | Accela Chemical reagent                |
| HCl                             | 36.0-38.0 wt% | Fengchuan Reagent Technology Co., Ltd. |

## 2.2. Preparation of NADESS

**Table S2.** Preparation of NADESS<sup>a</sup>

| Type     | HBA             |                         | Betaine Hydrochloride       |                     | Choline Chloride        |                             |                     |
|----------|-----------------|-------------------------|-----------------------------|---------------------|-------------------------|-----------------------------|---------------------|
|          | HBD             | Proportion <sup>b</sup> | Phase separation capability | Extraction rate (%) | Proportion <sup>b</sup> | Phase separation capability | Extraction rate (%) |
| Acids    | Acetic acid     | 1:1:0                   | Poor                        | —                   | 1:1:0                   | Poor                        | —                   |
|          | Glacial         |                         |                             |                     |                         |                             |                     |
|          | Oxalic acid     | 1:1:2                   | Poor                        | —                   | 1:1:2                   | Poor                        | —                   |
|          | Propionic acid  | 1:1:0                   | Ordinary                    | 93.6                | 1:1:0                   | Ordinary                    | 93.9                |
|          | Malonic acid    | 1:1:2                   | Poor                        | —                   | 1:1:2                   | Poor                        | —                   |
|          | Lactic acid     | 1:1:0                   | Fine                        | 96.4                | 1:1:0                   | Fine                        | 96.2                |
|          | Butyric acid    | 1:1:0                   | Ordinary                    | 93.1                | 1:1:0                   | Ordinary                    | 94.5                |
|          | DL-Malic acid   | 3:2:6                   | Poor                        | —                   | 1:1:2                   | Poor                        | —                   |
|          | Sorbic acid     | 1:1:2                   | Poor                        | —                   | 1:1:2                   | Poor                        | —                   |
|          | Itaconic acid   | 1:1:2                   | Poor                        | —                   | 1:1:2                   | Poor                        | —                   |
| Alcohols | Methyl alcohol  | 1:1:0                   | Poor                        | —                   | 1:1:0                   | Poor                        | —                   |
|          | Ethanol         | 1:3:0                   | Poor                        | —                   | 1:4:0                   | Poor                        | —                   |
|          | Ethylene glycol | 1:2:0                   | Ordinary                    | 88.6                | 1:1:2                   | Ordinary                    | 89.4                |
|          | 1-Propanol      | 1:1:0                   | Poor                        | —                   | 1:1:0                   | Poor                        | —                   |
|          | 1,3-Propanediol | 1:4:0                   | Ordinary                    | 89.8                | 1:4:0                   | Ordinary                    | 90.8                |
|          | 2-Propanol      | 1:1:0                   | Poor                        | —                   | 1:1:0                   | Poor                        | —                   |
|          | Glycerol        | 1:2:1                   | Poor                        | —                   | 1:2:1                   | Poor                        | —                   |
|          | 1-Butanol       | 1:1:0                   | Poor                        | —                   | 1:4:0                   | Poor                        | —                   |
| Xylitol  | 2:1:8           | Poor                    | —                           | 1:1:1               | Fine                    | 96.1                        |                     |
| Sugars   | D-(+)-Glucose   | 1:1:4                   | Poor                        | —                   | 1:1:4                   | Poor                        | —                   |
|          | D-(-)-Fructose  | 2:1:2                   | Poor                        | —                   | 1:1:4                   | Poor                        | —                   |

<sup>a</sup> [NADES] ≈ 25.0 wt%; [K<sub>3</sub>PO<sub>4</sub>] ≈ 40.0 wt%; [Au(S<sub>2</sub>O<sub>3</sub>)<sub>2</sub><sup>3-</sup>] = 200 mg·L<sup>-1</sup>; pH = 10; T = 298.15 K; t = 20 min.

<sup>b</sup> Refers to the molar ratio of HBA, HBD, and water.

## 2.2. Preparation of NADESSs

### Characterization of NADESSs: $^1\text{H}$ NMR analysis results

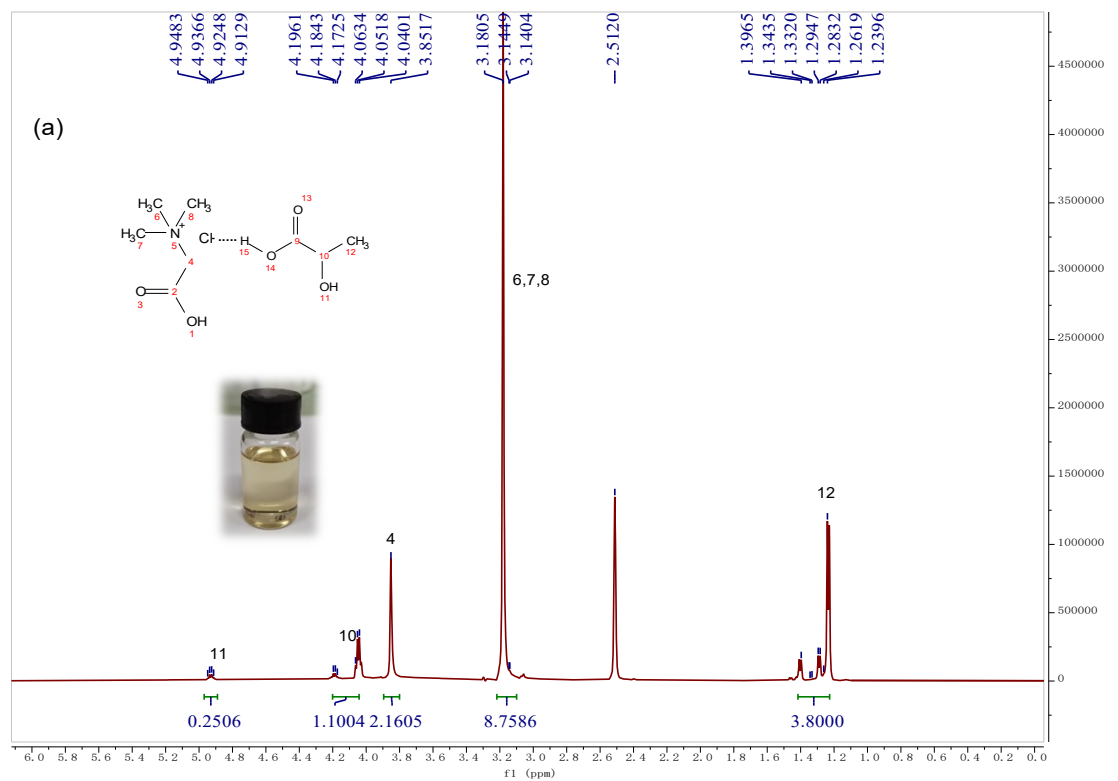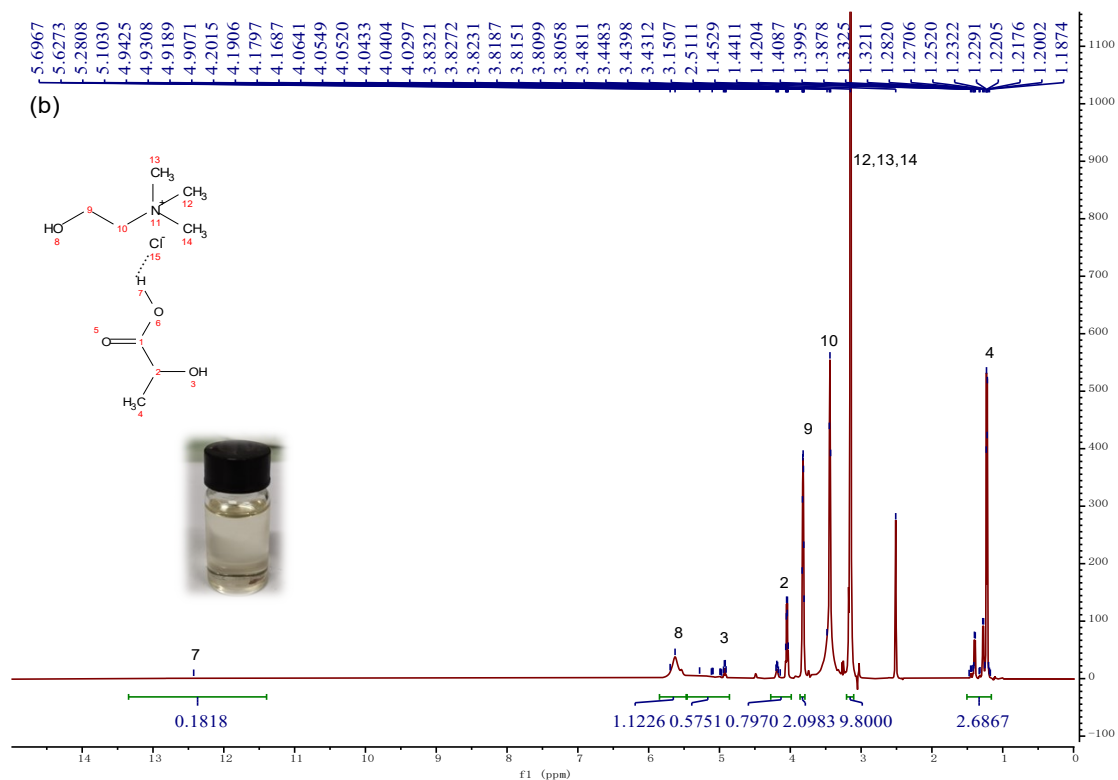

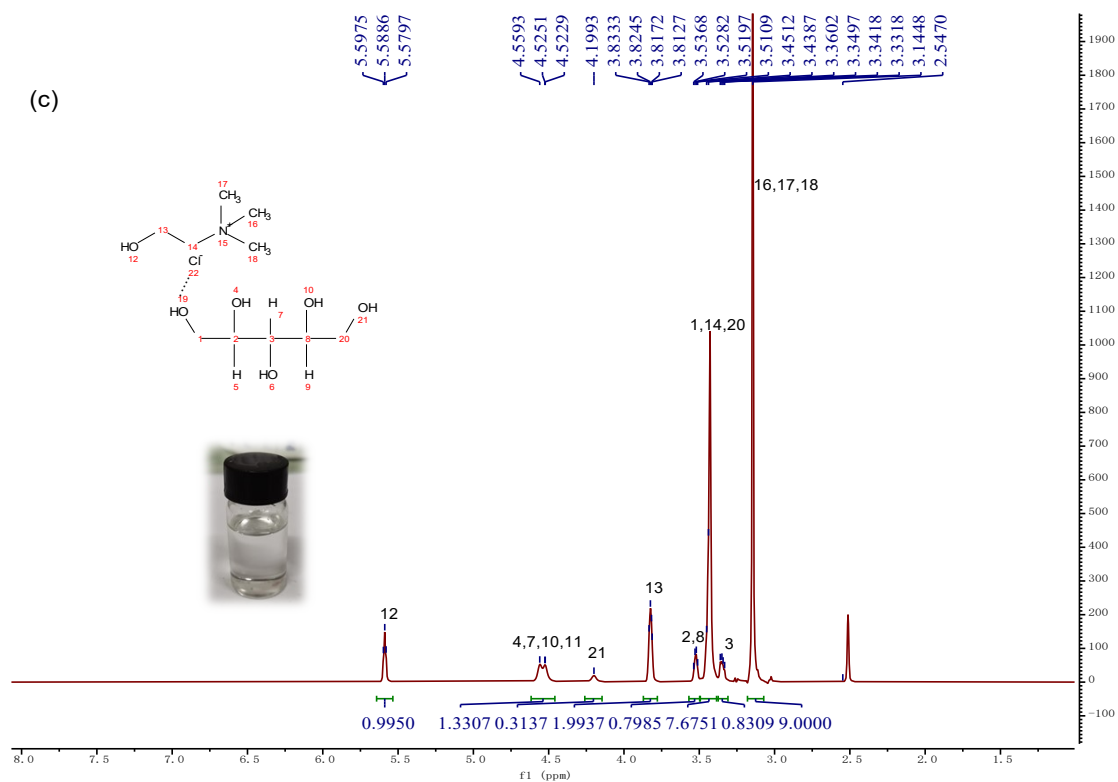

**Fig. S1.** (a)~(c) represent  $^1\text{H}$  NMR spectra of Bet-Lac, ChCl-Lac and ChCl-Xyl with DMSO- $d_6$  as the solvent, respectively

**Table S3.**  $^1\text{H}$  NMR data of Bet-Lac, ChCl-Lac and ChCl-Xyl. (600 MHz, DMSO- $d_6$ ).

| Name     | $^1\text{H}$ NMR (ppm)                                                                                                                                                                                                |
|----------|-----------------------------------------------------------------------------------------------------------------------------------------------------------------------------------------------------------------------|
| Bet-Lac  | $\delta$ 4.9306 (q, $J = 7.1$ Hz, 1H), 4.0518 (m, 1H), 3.8517 (s, 2H), 3.1805 (s, 9H), 1.2672 (m, 3H).                                                                                                                |
| ChCl-Lac | $\delta$ 12.4255 (s, 1H), 5.6273 (s, 1H), 4.9960 (m, 1H), 4.0474 (m, 1H), 3.8210 (tt, $J = 5.3, 3.0$ Hz, 2H), 3.4398 (t, $J = 5.1$ Hz, 2H), 3.1507 (s, 9H), 1.2363 (m, 3H).                                           |
| ChCl-Xyl | $\delta$ 5.5886 (t, $J = 5.3$ Hz, 1H), 4.5358 (m, 4H), 4.1993 (s, 1H), 3.8250 (t, $J = 4.8$ Hz, 2H), 3.5239 (q, $J = 5.2$ Hz, 2H), 3.4450 (d, $J = 7.5$ Hz, 6H), 3.3459 (dd, $J = 10.9, 6.2$ Hz, 1H), 3.1448 (s, 9H). |

## Characterization of NADESs: FT-IR analysis

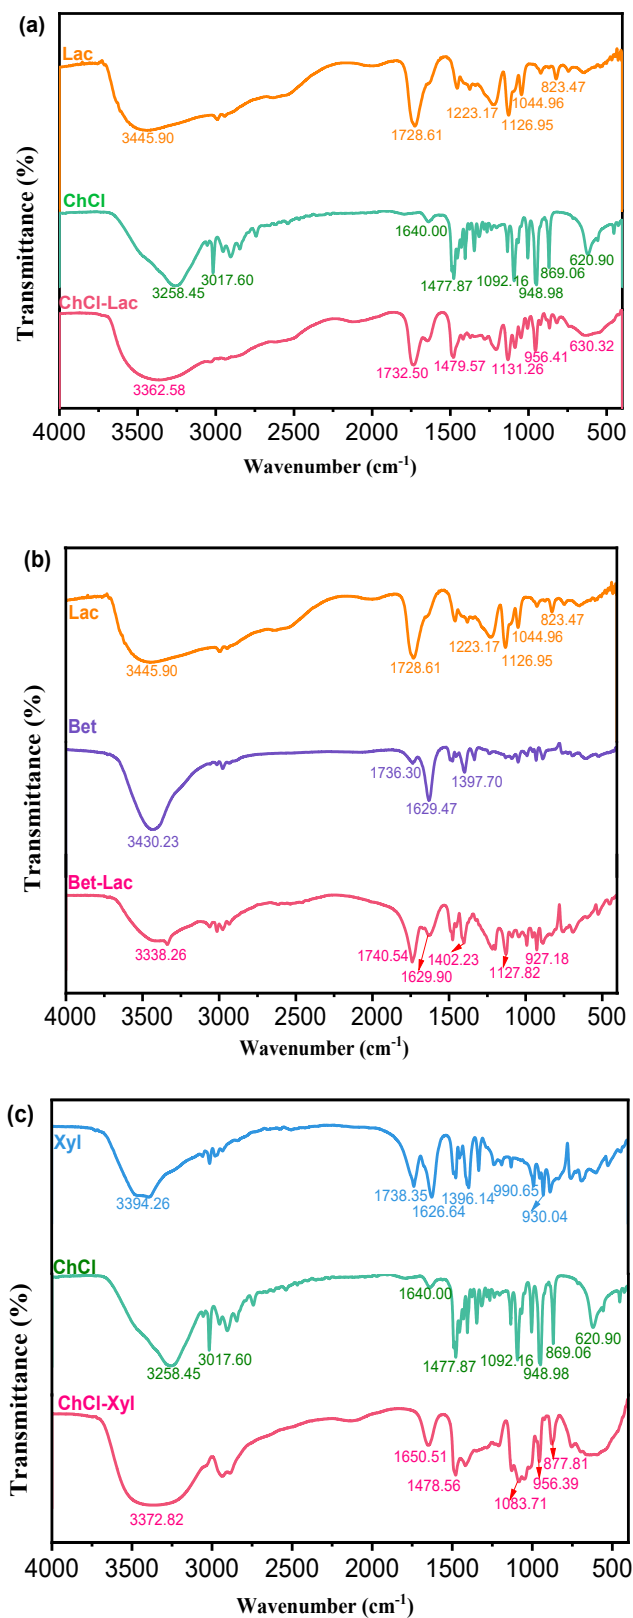

**Fig. S2.** FT-IR spectra of pure substances ChCl-Lac (a), Bet-Lac (b) and ChCl-Xyl (c).

### **TEXT S1. FT-IR analysis of NADESs**

To study the interaction between the HBA (Bet or ChCl) and HBD (Lac or Xyl), the raw materials and synthesized compounds were characterized using FT-IR. In the FT-IR spectrum of pure Lac (Fig. S2a), there is a broad peak at  $3445.90\text{ cm}^{-1}$  that corresponds to the -OH stretching vibration. After ChCl-Lac formed, the -OH absorption band was dispersed and wider; also, the frequency was redshifted to  $3362.58\text{ cm}^{-1}$ .<sup>1</sup> These results indicate that the -OH in the carboxyl group forms an intermolecular hydrogen bond with the chloride in ChCl.<sup>2</sup> Furthermore, the stretching vibration peak of C=O is at  $1728.61\text{ cm}^{-1}$  in the spectrum of pure Lac. After ChCl-Lac was generated, the stretching vibration peak of C=O shifted to  $1732.50\text{ cm}^{-1}$  ( $\Delta\lambda \approx 4\text{ cm}^{-1}$ ). The reason for this is that the generation of intermolecular hydrogen bonds causes the electron cloud between the atoms in the C=O bond, which was originally close to the O atom, to move to a certain extent toward the C atom, thus affecting the tensile vibration of C=O. Bet-Lac and ChCl-Xyl have similar results; details are provided in Fig. S2b and c. These FT-IR results confirm that the HBAs and HBDs proposed in this work successfully formed NADESs through hydrogen bonds.

### **2.4. Extraction procedures**

#### **TEXT S2. Preparation of the stock solution of $\text{Au}(\text{S}_2\text{O}_3)_2^{3-}$**

Preparation of gold thiosulfate  $[\text{Au}(\text{S}_2\text{O}_3)_2]^{3-}$ : First, pure gold was dissolved in aqua regia on a heating plate, followed by nitrate removal with  $6\text{ mol}\cdot\text{L}^{-1}$  HCl for 3 times. Thereafter, the gold solution was dissolved to  $2\text{ g}\cdot\text{L}^{-1}$  with deionized water and adjust the pH value of the solution to 9.0. Then add  $1.0\text{ mol}\cdot\text{L}^{-1}$   $\text{Na}_2\text{S}_2\text{O}_3$  solution into the above gold solution until the solution becomes colorless<sup>3</sup>. Finally, the solution was diluted to  $200\text{ mg}\cdot\text{L}^{-1}$  with deionized water and adjusting the pH to 9.0 for standby.



**Table S4.** Distribution ratio of NADES + K<sub>3</sub>PO<sub>4</sub> + water system at extraction equilibrium <sup>c</sup>

| Distribution ratio                                                                           | NADES                                                            |            |             |            |
|----------------------------------------------------------------------------------------------|------------------------------------------------------------------|------------|-------------|------------|
|                                                                                              | Bet-Lac                                                          | ChCl-Lac   | ChCl-Xyl    |            |
| Concentration of gold (mg/L)                                                                 | 5.00                                                             | /          | /           | /          |
|                                                                                              | 10.00                                                            | /          | /           | /          |
|                                                                                              | 25.00                                                            | /          | /           | /          |
|                                                                                              | 50.00                                                            | 79.91±4.37 | /           | 97.61±2.86 |
|                                                                                              | 100.00                                                           | 39.82±1.99 | 64.79±3.30  | 87.36±1.97 |
|                                                                                              | 200.00                                                           | 24.17±0.57 | 28.31±0.82  | 79.31±2.45 |
|                                                                                              | 500.00                                                           | 19.09±1.63 | 22.84±1.07± | 60.04±3.84 |
|                                                                                              | 900.00                                                           | 18.13±0.88 | 21.96±1.57  | 55.48±1.93 |
| Time (min)                                                                                   | 1.00                                                             | 16.19±0.75 | 22.35±1.50  | 40.61±2.32 |
|                                                                                              | 3.00                                                             | 17.12±2.79 | 23.68±2.87  | 43.14±2.58 |
|                                                                                              | 5.00                                                             | 17.22±3.18 | 23.71±1.61  | 43.84±0.80 |
|                                                                                              | 10.00                                                            | 17.52±1.56 | 24.23±2.32  | 65.11±2.24 |
|                                                                                              | 15.00                                                            | 17.62±2.40 | 24.46±3.27  | 72.52±1.38 |
|                                                                                              | 20.00                                                            | 17.72±0.57 | 24.34±0.71  | 79.31±2.45 |
| pH                                                                                           | 7.00                                                             | 6.62±0.32  | 9.32±0.90   | 14.91±0.24 |
|                                                                                              | 8.00                                                             | 10.21±0.77 | 14.14±0.83  | 30.29±3.23 |
|                                                                                              | 9.00                                                             | 17.72±0.57 | 24.34±0.71  | 79.31±2.45 |
|                                                                                              | 10.00                                                            | 10.06±2.94 | 14.07±1.86  | 33.21±2.62 |
|                                                                                              | 11.00                                                            | 8.41±1.12  | 11.76±1.21  | 17.60±1.28 |
|                                                                                              | 12.00                                                            | 7.43±0.43  | 10.39±0.87  | 15.31±0.89 |
|                                                                                              | 13.00                                                            | 6.18±0.45  | 8.68±0.52   | 12.82±0.56 |
|                                                                                              | 14.00                                                            | 5.77±0.65  | 8.10±0.43   | 11.91±0.39 |
| T(K)                                                                                         | 298.15                                                           | 17.72±0.57 | 24.34±0.71  | 79.31±2.45 |
|                                                                                              | 303.15                                                           | 19.30±0.23 | 26.48±0.83  | 80.93±0.85 |
|                                                                                              | 313.15                                                           | 22.57±1.35 | 31.06±2.71  | 86.38±1.93 |
|                                                                                              | 323.15                                                           | 25.14±2.02 | 34.59±2.38  | 92.57±2.20 |
|                                                                                              | 333.15                                                           | 29.40±0.52 | 39.03±1.98  | 99.63±0.00 |
| Selectivity of NADES-ATPSs for Au(S <sub>2</sub> O <sub>3</sub> ) <sub>2</sub> <sup>3-</sup> | [Au(S <sub>2</sub> O <sub>3</sub> ) <sub>2</sub> ] <sup>3-</sup> | 21.54±0.78 | 23.01±1.57  | 73.26±2.56 |
|                                                                                              | [Cu(NH <sub>3</sub> ) <sub>4</sub> ] <sup>2+</sup>               | 0.00       | 0.00        | 0.00       |
|                                                                                              | [Ni(NH <sub>3</sub> ) <sub>6</sub> ] <sup>2+</sup>               | 0.06±0.01  | 0.00        | 0.39±0.02  |
|                                                                                              | [Co(NH <sub>3</sub> ) <sub>6</sub> ] <sup>3+</sup>               | 0.11±0.01  | 0.09±0.02   | 0.48±0.03  |

<sup>c</sup>  $SD = \left( \sum_{i=1}^n (X_{exp} - X_{ave})^2 / (n - 1) \right)^{0.5}$ , where  $X_{exp}$  and  $X_{ave}$  represent the experimental and average values of the distribution coefficient respectively, and n represents the number of samples.

### TEXT S3. Preparation of MoS<sub>2</sub>

In this work, we obtained layered nanosheets MoS<sub>2</sub> based on a rapid microwave-assistant solvothermal synthesis method. First, add ammonium molybdate(VI) tetrahydrate (4 mmol) and thiourea (60 mmol) into 50 ml of deionized water and stir evenly at room temperature. Then, the solution was transferred to a 100 mL reaction tank and heated in a microwave reactor (UWave-2000) at a microwave power of 400 W at 200°C for 120 minutes. After synthesis, it was washed three times with deionized water and separated by centrifuge (8000 rpm, 10 minutes). The synthesized MoS<sub>2</sub> was dried in a vacuum drying oven at 80 °C for 24 hours and then stored for use.

### 3.3. Correlation of binodal curve and tie-line.

**Table S5.** Fitting parameters of NADES + K<sub>3</sub>PO<sub>4</sub> + water system

|          | a        | b        | c      | d       | R <sup>2</sup> | SD <sup>d</sup> |
|----------|----------|----------|--------|---------|----------------|-----------------|
| Bet-Lac  | 163.8657 | -48.7758 | 4.6932 | -0.0180 | 0.9987         | 0.1056          |
| ChCl-Lac | 145.9355 | -46.9527 | 5.0954 | -0.0247 | 0.9963         | 0.4665          |
| ChCl-Xyl | 213.2084 | -46.4719 | 2.0229 | 0.0109  | 0.9985         | 0.1769          |

$SD = \left( \sum_{i=1}^n (w_N^{cal} - w_N^{exp})^2 / N \right)^{0.5}$ , where  $w_N^{cal}$  and  $w_N^{exp}$  represent the calculated and experimental values of the mass fraction of NADES respectively, and N represents the number of double nodes.

**Table S6.** Tie-line data of NADES + K<sub>3</sub>PO<sub>4</sub> + water system <sup>e</sup>

|          | Total system |       | Bottom phase |       |       | Top phase |       |       | S     | TLL   |
|----------|--------------|-------|--------------|-------|-------|-----------|-------|-------|-------|-------|
|          | K(A)         | N(A)  | K(B)         | N(B)  | W(B)  | K(T)      | N(T)  | W(T)  |       |       |
| Bet-Lac  | 35.00        | 25.00 | 48.83        | 9.37  | 41.80 | 9.70      | 48.24 | 42.06 | -0.99 | 55.15 |
| ChCl-Lac | 32.50        | 25.00 | 45.77        | 9.71  | 44.52 | 6.42      | 50.23 | 43.35 | -1.03 | 56.48 |
| ChCl-Xyl | 40.00        | 25.00 | 38.86        | 18.63 | 42.51 | 10.52     | 52.15 | 37.33 | -1.18 | 43.89 |

<sup>e</sup> where K, N, and W represent the mass fraction (wt%) of K<sub>3</sub>PO<sub>4</sub>, NADES, and water respectively, and A, T, and B represent all, the top and bottom phases respectively.

### 3.4. Optimization of the extraction by NADESs

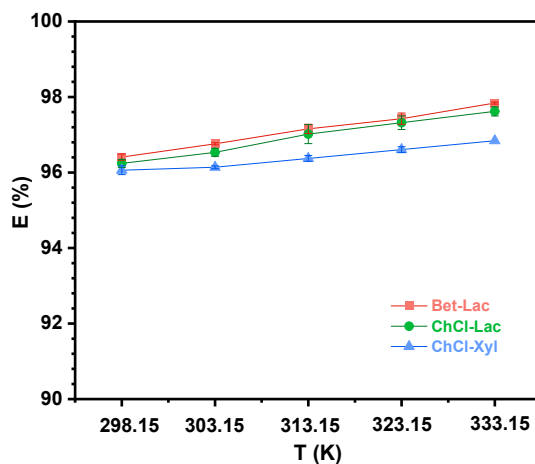

**Fig. S3.** Effects of temperature on extraction of  $\text{Au}(\text{S}_2\text{O}_3)_2^{3-}$  under the conditions of  $[\text{ChCl-Lac}] \approx 25.0 \text{ wt}\%$ ,  $[\text{K}_3\text{PO}_4] \approx 32.5 \text{ wt}\%$ ,  $[\text{Au(I)}] = 200 \text{ mg}\cdot\text{L}^{-1}$ ,  $\text{pH} = 9.0$  and  $\text{time} = 20 \text{ min}$ .

**Table S7.** Thermodynamic parameters of extraction of  $\text{Au}(\text{S}_2\text{O}_3)_2^{3-}$  by NADES-ATPSs

| T(K)   | NADES-ATPS | $\Delta G_m^0(\text{kJ}\cdot\text{mol}^{-1})$ | $\Delta H_m^0(\text{kJ}\cdot\text{mol}^{-1})$ | $\Delta S_m^0(\text{J}\cdot\text{mol}^{-1} \text{K}^{-1})$ | $T \times \Delta S_m^0(\text{kJ}\cdot\text{mol}^{-1})$ |
|--------|------------|-----------------------------------------------|-----------------------------------------------|------------------------------------------------------------|--------------------------------------------------------|
| 298.15 |            | -10.91±0.38                                   |                                               |                                                            | 18.80±0.38                                             |
| 303.15 |            | -11.23±0.39                                   |                                               |                                                            | 19.11±0.39                                             |
| 313.15 | Bet-lac    | -11.86±0.40                                   | 11.66±0.40                                    | 63.04±1.29                                                 | 19.74±0.40                                             |
| 323.15 |            | -12.49±0.42                                   |                                               |                                                            | 20.37±0.42                                             |
| 333.15 |            | -13.12±0.43                                   |                                               |                                                            | 21.00±0.43                                             |
| 298.15 |            | -10.74±0.38                                   |                                               |                                                            | 18.99±0.38                                             |
| 303.15 |            | -11.06±0.38                                   |                                               |                                                            | 19.31±0.38                                             |
| 313.15 | ChCl-lac   | -11.70±0.39                                   | 11.05±0.39                                    | 63.70±1.26                                                 | 19.95±0.39                                             |
| 323.15 |            | -12.34±0.41                                   |                                               |                                                            | 20.58±0.41                                             |
| 333.15 |            | -12.97±0.42                                   |                                               |                                                            | 21.22±0.42                                             |
| 298.15 |            | -8.53±0.28                                    |                                               |                                                            | 16.25±0.28                                             |
| 303.15 |            | -8.80±0.28                                    |                                               |                                                            | 16.52±0.28                                             |
| 313.15 | ChCl-Xyl   | -9.34±0.29                                    | 5.44±0.29                                     | 54.51±0.93                                                 | 17.07±0.29                                             |
| 323.15 |            | -9.89±0.30                                    |                                               |                                                            | 17.62±0.30                                             |
| 333.15 |            | -10.43±0.31                                   |                                               |                                                            | 18.16±0.31                                             |

### 3.6. Characterization of NADES-rich phase loaded with Au(I).

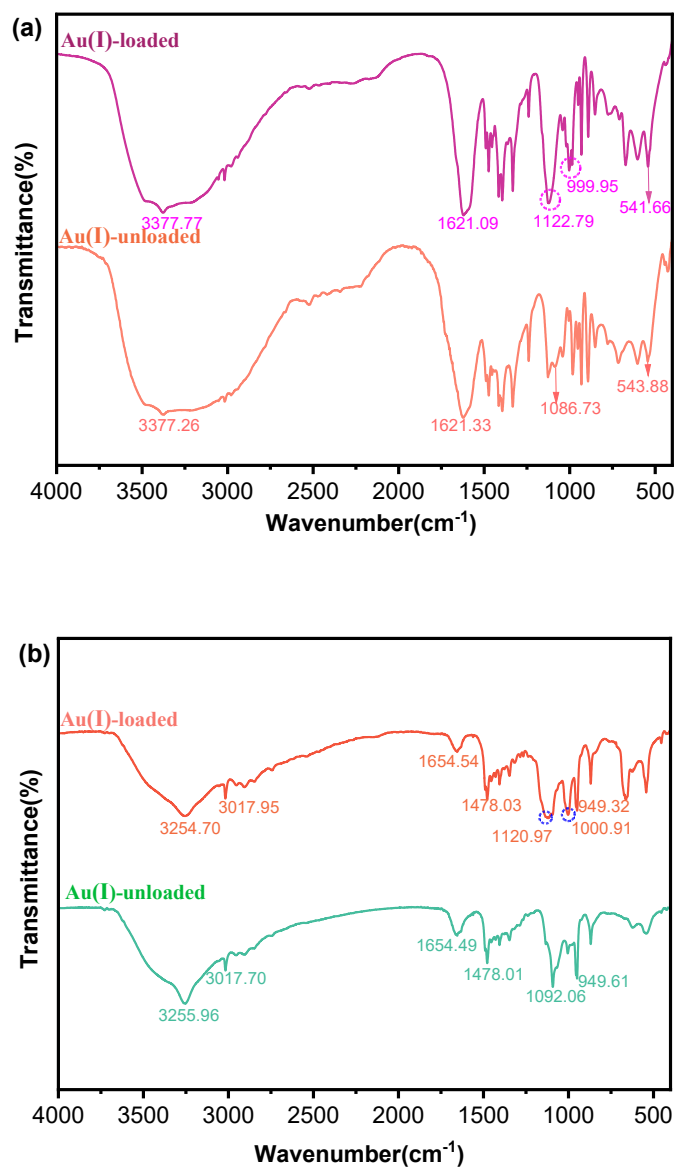

Fig. S4. FT-IR spectra of Bet-Lac (a) and ChCl-Xyl (b) before and after loaded with Au(I)

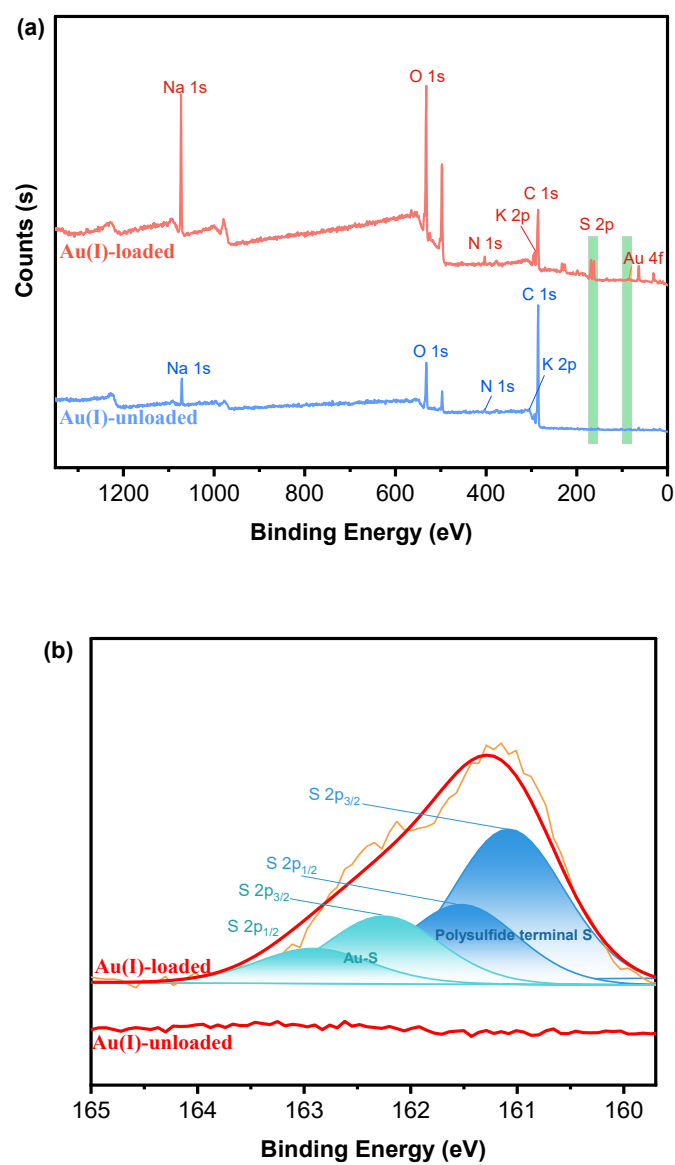

**Fig. S5.** Wide scanning XPS spectra (a) and S 2p spectra (b) of the NADES-rich phase with or without Au(I) loaded.

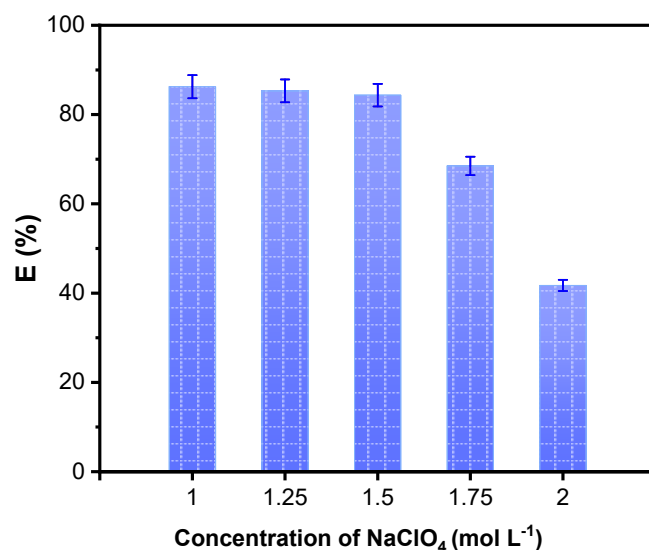

**Fig. S6.** Effects of ClO<sub>4</sub><sup>-</sup> content on extraction efficiency under the conditions of [ChCl-Lac] =25.0 wt%, [K<sub>3</sub>PO<sub>4</sub>]=32.5 wt%, [Au(I)] = 200 mg·L<sup>-1</sup>, pH = 9.0, T = 298.15 K and t = 20 min.

#### TEXT S4. Characterization of MoS<sub>2</sub>

XRD analysis. 2H MoS<sub>2</sub> usually exhibits a poor electrochemical performance due to limited active sites and intrinsic poor electrical transport property.<sup>4</sup> Moreover, MoS<sub>2</sub> tends to form a stable 2H phase by restacking during the process of synthesis due to a thermodynamically metastable 1T phase.<sup>5,6</sup> In addition, compared with 2H phase MoS<sub>2</sub>, metallic 1T phase MoS<sub>2</sub> can promote both ion diffusion and electron transport due to the higher conductivity and the large number of edge active sites of 1T-MoS<sub>2</sub> that can accelerate the redox kinetics of polysulfides.<sup>7-9</sup>

Compared with traditional hydrothermal methods, microwave-assistant solvothermal synthesis method has fast, uniform, and efficient heating;<sup>10</sup> thus, the resulting MoS<sub>2</sub> has more active sites and intrinsic activity. MoS<sub>2</sub>, generally in the form of semiconductor phase (2H), but when ion migration occurs, it can be converted into metastable metal phase (1T). To obtain MoS<sub>2</sub> with high catalytic efficiency, we use a rapid microwave-assistant solvothermal synthesis method to convert part of the inert 2H phase into the catalytically active 1T phase. The prepared MoS<sub>2</sub> nanomaterial was characterized by XRD, as shown in Fig. S7. The characteristic diffraction peaks observed at 2θ = 9.1° and 18.2° of the sample correspond to the crystal plane (002) and crystal plane (004) of 1T-MoS<sub>2</sub> respectively.<sup>11,12</sup> The diffraction peaks at 2θ = 32.5°, 35.8° and 57.8° correspond to the (100),

(102) and (110) crystal planes of 2H-MoS<sub>2</sub> (JCPDS card No. 73-1508),<sup>13</sup> respectively. This indicates the presence of a thermodynamically unstable 1T phase in the final product under the rapid synthesis of microwave-assistant solvothermal synthesis method. The final product is amorphous MoS<sub>2</sub> with 1T phase and 2H phase coexistence. The absence of the 002 diffraction at  $2\theta = 14.4^\circ$  suggests that absence of stacking, thus the sample should be an aggregate of single sheets of MoS<sub>2</sub>.<sup>14</sup> This proves that an amorphous phase of MoS<sub>2</sub> is formed.<sup>15</sup>

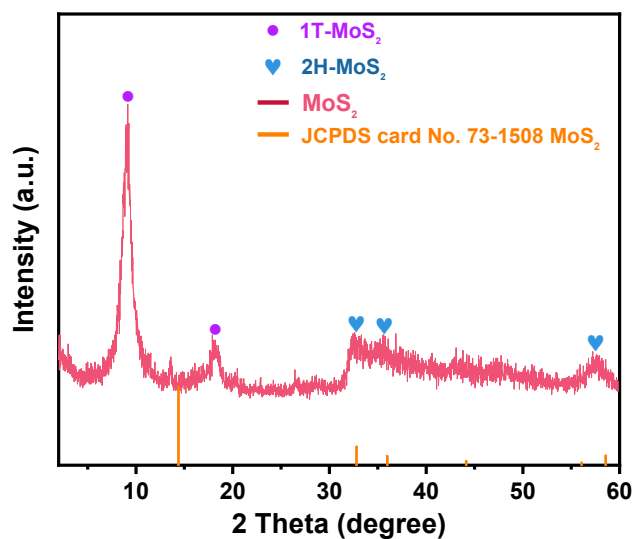

Fig. S7. XRD patterns of MoS<sub>2</sub> that were synthesized using a microwave-assisted method.

### 3.8. Reduction mechanism of MoS<sub>2</sub>

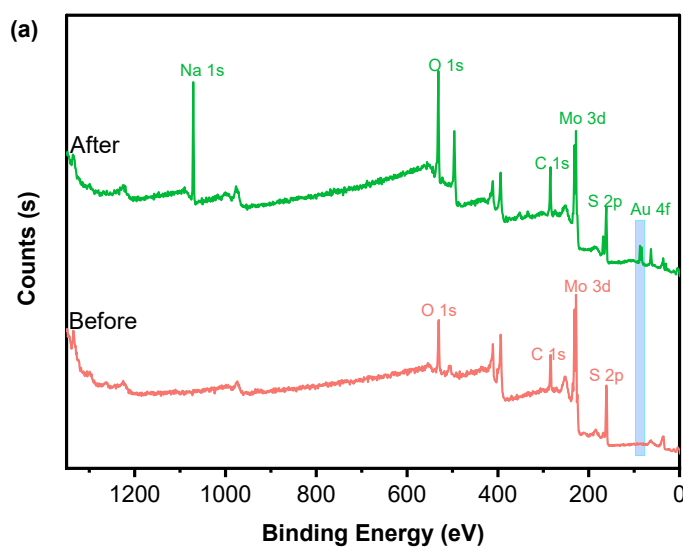

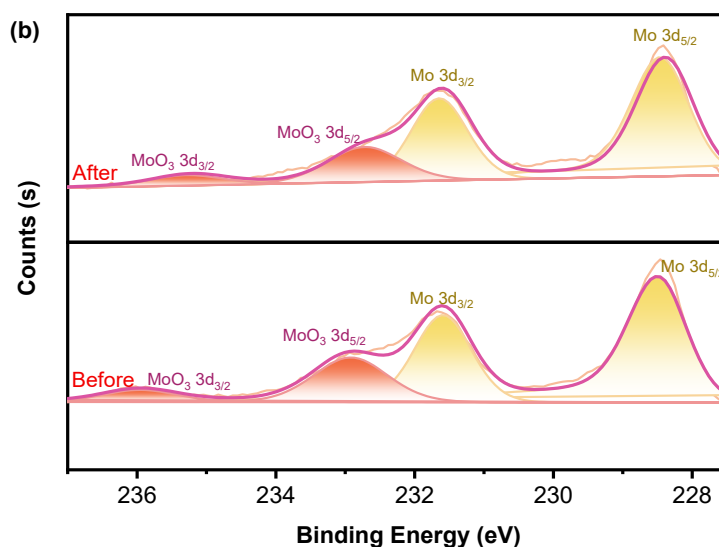

**Fig. S8.** Wide scanning XPS spectra (a) and Mo 3d spectra (b) of sediments before and after reduction

#### **TEXT S5. Mechanism of gold recovery from NADES-rich phase by MoS<sub>2</sub>**

UV–vis diffuse reflectance spectroscopy (DRS) of MoS<sub>2</sub> is presented in Fig. S9a. MoS<sub>2</sub> shows excellent absorption properties in both the ultraviolet and visible light regions because of the quantum effect of the transverse size of MoS<sub>2</sub>. This is consistent with the value that was obtained by Ghaleghafi et al. <sup>16</sup> and is very different from MoS<sub>2</sub> with good crystallization. This further confirms the high disorder of the quasi-amorphous phase of MoS<sub>2</sub>. The bandgap ( $E_g$ ) of semiconductors can be obtained according to the tauc plot method <sup>17</sup>, which uses Eq. (S1).

$$(\alpha h\nu)^{\frac{1}{n}} = A(h\nu - E_g) \quad (S1)$$

Here,  $\alpha$ ,  $h$ ,  $\nu$ ,  $A$ , and  $E_g$  are the absorbance, Planck's constant, the optical frequency, a constant, and the semiconductor bandgap, respectively. The index  $n$  is related to the type of semiconductor that is used. For the indirect bandgap semiconductor MoS<sub>2</sub>, the index  $n$  is 2. The value of  $E_g$  for MoS<sub>2</sub> was obtained from Fig. S9b and is 1.66 eV. This is consistent with the value that was obtained by Zeng et al. <sup>18</sup>. In addition, other essential parameters (the photocatalytic reaction, conduction



band energy ( $E_{CB}$ ), and valence band energy ( $E_{VB}$ ) can be calculated using Eqs. (S2)-(S4) <sup>19</sup>.

$$E_{CB} = X - E_e - 0.5E_g \quad (S2)$$

$$E_{VB} = E_g + E_{CB} \quad (S3)$$

$$\chi = [\chi(\text{Mo})^a \chi(\text{S})^b]^{1/(a+b)} \quad (S4)$$

$\chi$  represents the Mulliken electronegativity of the semiconductor  $\text{MoS}_2$ ; a and b refer to the atomic numbers of Mo and S in  $\text{MoS}_2$ , respectively.  $E_e$ ,  $E_{CB}$ , and  $E_{VB}$  are the energy of free electrons and hydrogen (4.5 eV), the conduction band, and the valence band of  $\text{MoS}_2$ , respectively. According to ref. <sup>20</sup>, the values of  $\chi(\text{Mo})$  and  $\chi(\text{S})$  are 3.90 and 6.22, respectively. From the above equations, the value of  $\chi$  for  $\text{MoS}_2$  is 5.32, and the values of  $E_{CB}$  and  $E_{VB}$  are -0.01 eV and 1.65 eV, respectively.

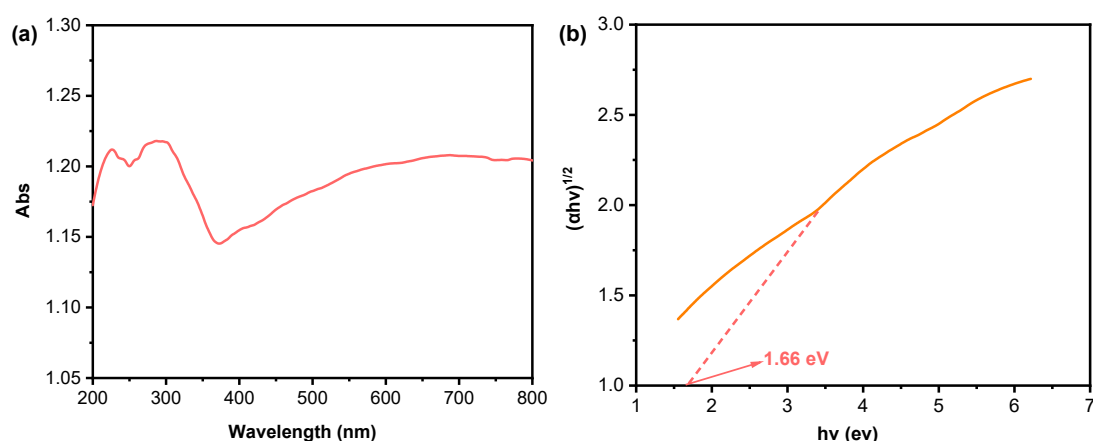

**Fig. S9.** Diffuse reflection absorption curve of  $\text{MoS}_2$  (a) and Tauc plots of  $\text{MoS}_2$  (b)

### TEXT S6. Construction of a cyclic model

First, according to method 2.4,  $\text{Au}(\text{S}_2\text{O}_3)_2^{3-}$  was extracted from the solution using  $\text{ChCl-Lac-ATPS}$ . After separating the salt-rich and NADES-rich phases, defect-rich  $\text{MoS}_2$  was added to the NADES-rich phase for the photocatalytic reduction of  $\text{Au}(\text{S}_2\text{O}_3)_2^{3-}$ . After centrifugal separation, the NADES-rich phase was washed with 40.0 wt%  $\text{K}_3\text{PO}_4$  solutions to regenerate NADES. The gold-

loaded sediment was eluted with  $1.0 \text{ mol}\cdot\text{L}^{-1}$   $\text{Na}_2\text{S}$  solution at room temperature for three hours (the elution rate reached 99.9%) and then centrifuged to separate the sediment. The sediment was washed with ultrapure water and ethanol and dried in a vacuum drying oven at  $60 \text{ }^\circ\text{C}$  for 24 hours. Then, the regenerated  $\text{ChCl-Lac}$  and  $\text{MoS}_2$  were repeatedly used to extract and reduce  $\text{Au(I)}$ . It is worth noting that, the salt addition during cyclic extraction comes from the salt-rich salt content in the phase diagram.

### **TEXT S7. The calculation details**

#### **Computing software:**

Structure optimization frequency calculation: Gauss 09 electrostatic potential: Multiwfn 3.8.

Computing level: b3lyp/6-311G\* (C, H, P, N, Cl) SDD (Au) scrf=(smd, solvent=water) em=gd3bj.

Au is optimized using pseudopotential basis set SDD<sup>21,22</sup>, S, O, C, N, and H adopt a 6-311G(d) foundation set. The electrostatic potential of the local surface (ESP) is generated by the Multiwfn 3.8 program (the isosurface is defined as the electrostatic potential of  $0.002\text{au}$ )<sup>23</sup>.

**Au(S<sub>2</sub>O<sub>3</sub>)<sub>2</sub><sup>3-</sup>**

-3 1

|    |             |             |             |
|----|-------------|-------------|-------------|
| Au | -0.00001600 | -0.72619300 | -0.00001500 |
| S  | 3.06895900  | 0.82909800  | 0.16774000  |
| S  | -3.06886700 | 0.82914100  | -0.16769400 |
| S  | 2.15091100  | -0.75110200 | -0.94142200 |
| S  | -2.15099600 | -0.75124100 | 0.94141300  |
| O  | 3.07743600  | 0.43486400  | 1.60845400  |
| O  | 4.44586600  | 0.92213100  | -0.40128700 |
| O  | 2.27527100  | 2.07255700  | -0.06388500 |
| O  | -2.27517000 | 2.07259300  | 0.06396400  |
| O  | -3.07746000 | 0.43494300  | -1.60841900 |
| O  | -4.44579800 | 0.92228000  | 0.40124700  |

|                                              |                             |
|----------------------------------------------|-----------------------------|
| Zero-point correction=                       | 0.028364 (Hartree/Particle) |
| Thermal correction to Energy=                | 0.041568                    |
| Thermal correction to Enthalpy=              | 0.042512                    |
| Thermal correction to Gibbs Free Energy=     | -0.016426                   |
| Sum of electronic and zero-point Energies=   | -2180.604578                |
| Sum of electronic and thermal Energies=      | -2180.591374                |
| Sum of electronic and thermal Enthalpies=    | -2180.590430                |
| Sum of electronic and thermal Free Energies= | -2180.649368                |

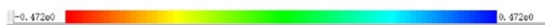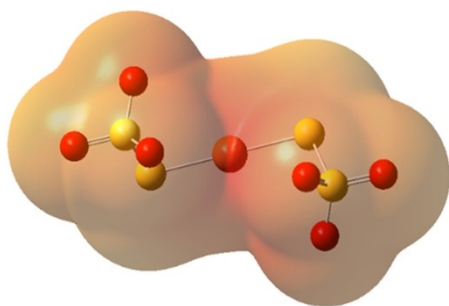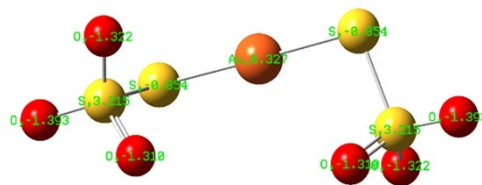

## Choline chloride

0 1

|    |             |             |             |
|----|-------------|-------------|-------------|
| C  | -2.62173300 | -0.67328600 | -0.02163400 |
| C  | -1.71876700 | 0.55688800  | -0.03434200 |
| N  | -0.23238200 | 0.28371000  | -0.01801200 |
| C  | 0.47880000  | 1.60447200  | -0.08135000 |
| O  | -3.97856300 | -0.23024000 | -0.03465600 |
| C  | 0.18019600  | -0.54040300 | -1.20209100 |
| C  | 0.17605100  | -0.41848300 | 1.24418800  |
| H  | -2.49298200 | -1.27251100 | -0.92195900 |
| H  | -2.43269400 | -1.30605800 | 0.84876200  |
| H  | -1.91651200 | 1.14460200  | -0.92975300 |
| H  | -1.92461500 | 1.17234900  | 0.84200200  |
| H  | 1.55024300  | 1.41554900  | -0.06036000 |
| H  | 0.19674400  | 2.10480100  | -1.00499300 |
| H  | 0.17842500  | 2.20043000  | 0.77756800  |
| H  | -4.17126100 | 0.16822400  | 0.82320000  |
| H  | -0.26106600 | -1.53004900 | -1.12296800 |
| H  | -0.16330300 | -0.04257400 | -2.10619200 |
| H  | 1.26571400  | -0.61787100 | -1.19463400 |
| H  | -0.27186500 | -1.40749800 | 1.26756100  |
| H  | 1.26111900  | -0.50232100 | 1.24440700  |
| H  | -0.16323300 | 0.17181500  | 2.09248400  |
| Cl | 3.75489300  | -0.29518100 | 0.02468100  |

|                                              |                             |
|----------------------------------------------|-----------------------------|
| Zero-point correction=                       | 0.198944 (Hartree/Particle) |
| Thermal correction to Energy=                | 0.210227                    |
| Thermal correction to Enthalpy=              | 0.211171                    |
| Thermal correction to Gibbs Free Energy=     | 0.160565                    |
| Sum of electronic and zero-point Energies=   | -789.096104                 |
| Sum of electronic and thermal Energies=      | -789.084821                 |
| Sum of electronic and thermal Enthalpies=    | -789.083877                 |
| Sum of electronic and thermal Free Energies= | -789.134483                 |

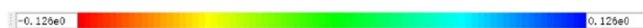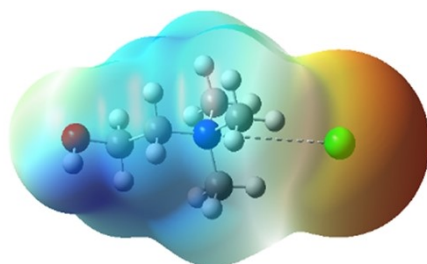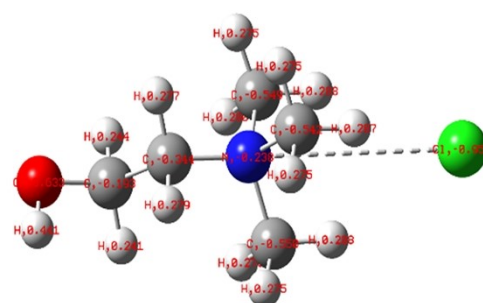

## Lactic acid

0 1

|   |             |             |             |
|---|-------------|-------------|-------------|
| O | 1.30942800  | 0.98338200  | -0.45492100 |
| C | 0.80163000  | -0.12967700 | 0.09360000  |
| C | -0.68854200 | -0.04111600 | 0.39824400  |
| C | -1.44457700 | -1.05564500 | -0.44942700 |
| O | -1.24425900 | 1.24050700  | 0.14418000  |
| O | 1.46575500  | -1.11851500 | 0.32816000  |
| H | 2.25895200  | 0.84647700  | -0.61053500 |
| H | -0.78840200 | -0.30289700 | 1.45830300  |
| H | -1.05724500 | -2.06066800 | -0.28165300 |
| H | -2.50216100 | -1.03735000 | -0.18150200 |
| H | -1.34576200 | -0.81046400 | -1.50972800 |
| H | -0.82384600 | 1.88054100  | 0.73126600  |

|                                              |                             |
|----------------------------------------------|-----------------------------|
| Zero-point correction=                       | 0.095074 (Hartree/Particle) |
| Thermal correction to Energy=                | 0.101722                    |
| Thermal correction to Enthalpy=              | 0.102666                    |
| Thermal correction to Gibbs Free Energy=     | 0.064425                    |
| Sum of electronic and zero-point Energies=   | -343.633160                 |
| Sum of electronic and thermal Energies=      | -343.626512                 |
| Sum of electronic and thermal Enthalpies=    | -343.625568                 |
| Sum of electronic and thermal Free Energies= | -343.663809                 |

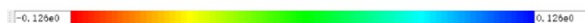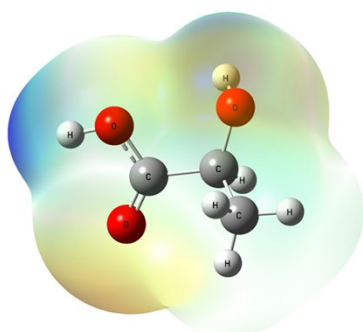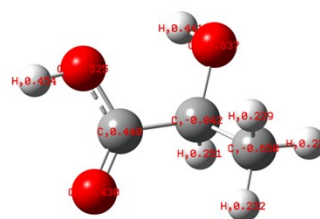

## Chlorine

-1 1

|    |            |            |            |
|----|------------|------------|------------|
| Cl | 0.00000000 | 0.00000000 | 0.00000000 |
|----|------------|------------|------------|

|                        |                             |
|------------------------|-----------------------------|
| Zero-point correction= | 0.000000 (Hartree/Particle) |
|------------------------|-----------------------------|

|                               |          |
|-------------------------------|----------|
| Thermal correction to Energy= | 0.001416 |
|-------------------------------|----------|

|                                 |          |
|---------------------------------|----------|
| Thermal correction to Enthalpy= | 0.002360 |
|---------------------------------|----------|

|                                          |           |
|------------------------------------------|-----------|
| Thermal correction to Gibbs Free Energy= | -0.015023 |
|------------------------------------------|-----------|

|                                            |             |
|--------------------------------------------|-------------|
| Sum of electronic and zero-point Energies= | -460.406331 |
|--------------------------------------------|-------------|

|                                         |             |
|-----------------------------------------|-------------|
| Sum of electronic and thermal Energies= | -460.404915 |
|-----------------------------------------|-------------|

|                                           |             |
|-------------------------------------------|-------------|
| Sum of electronic and thermal Enthalpies= | -460.403971 |
|-------------------------------------------|-------------|

|                                              |             |
|----------------------------------------------|-------------|
| Sum of electronic and thermal Free Energies= | -460.421354 |
|----------------------------------------------|-------------|

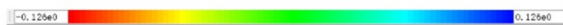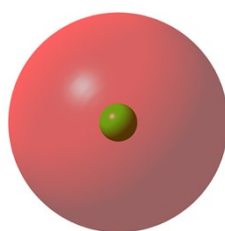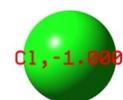

**Choline Chloride - Lactic acid**

0 1

|    |             |             |             |
|----|-------------|-------------|-------------|
| C  | -2.62094100 | -0.67533800 | -0.02151900 |
| C  | -1.71989000 | 0.55623000  | -0.03588200 |
| N  | -0.23291800 | 0.28559500  | -0.01777000 |
| C  | 0.47569400  | 1.60741500  | -0.08364200 |
| O  | -3.97837500 | -0.23410800 | -0.03536600 |
| C  | 0.18198400  | -0.54055200 | -1.19956100 |
| C  | 0.17567900  | -0.41292800 | 1.24636900  |
| H  | -2.49118100 | -1.27572600 | -0.92092100 |
| H  | -2.43122600 | -1.30651700 | 0.84987200  |
| H  | -1.91781100 | 1.14187400  | -0.93261200 |
| H  | -1.92735600 | 1.17309500  | 0.83908800  |
| H  | 1.54756200  | 1.42109200  | -0.06132600 |
| H  | 0.19353200  | 2.10495500  | -1.00875400 |
| H  | 0.17334700  | 2.20490900  | 0.77350700  |
| H  | -4.17171700 | 0.16521300  | 0.82195100  |
| H  | -0.25841400 | -1.53044800 | -1.11878000 |
| H  | -0.16091900 | -0.04510300 | -2.10519900 |
| H  | 1.26758100  | -0.61705900 | -1.19041300 |
| H  | -0.27166200 | -1.40212700 | 1.27220600  |
| H  | 1.26078900  | -0.49638100 | 1.24696600  |
| H  | -0.16411800 | 0.17933800  | 2.09307700  |
| Cl | 3.75610900  | -0.29719900 | 0.02435600  |
| O  | 9.71374378  | -0.05550170 | 0.17643408  |
| C  | 10.18214010 | -1.19866199 | -0.34455045 |
| C  | 11.69392126 | -1.21524224 | -0.53298242 |
| C  | 12.30823133 | -2.28660023 | 0.35820714  |
| O  | 12.31789676 | 0.02165047  | -0.22204858 |
| O  | 9.46962983  | -2.13587861 | -0.64091814 |
| H  | 8.74771517  | -0.12496408 | 0.25717128  |
| H  | 11.85660614 | -1.47691111 | -1.58526063 |
| H  | 11.86467190 | -3.26021402 | 0.14945693  |
| H  | 13.38198725 | -2.34248729 | 0.17239189  |
| H  | 12.14538767 | -2.04156468 | 1.41061203  |
| H  | 11.99062669 | 0.69380810  | -0.83209589 |

Zero-point correction= 0.294623 (Hartree/Particle)

Thermal correction to Energy= 0.314287

Thermal correction to Enthalpy= 0.315231

Thermal correction to Gibbs Free Energy= 0.241866

Sum of electronic and zero-point Energies= -1132.740379

Sum of electronic and thermal Energies= -1132.720714

Sum of electronic and thermal Enthalpies= -1132.719770

Sum of electronic and thermal Free Energies= -1132.793135

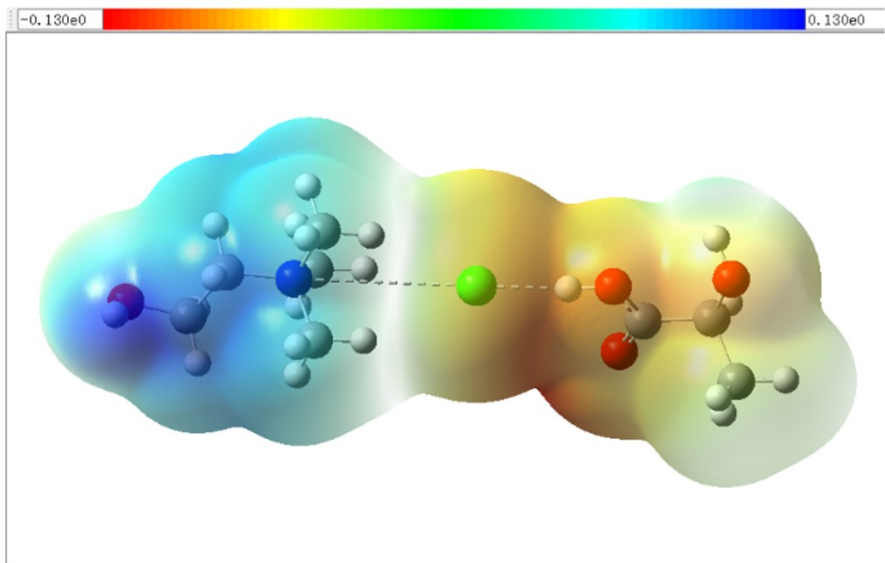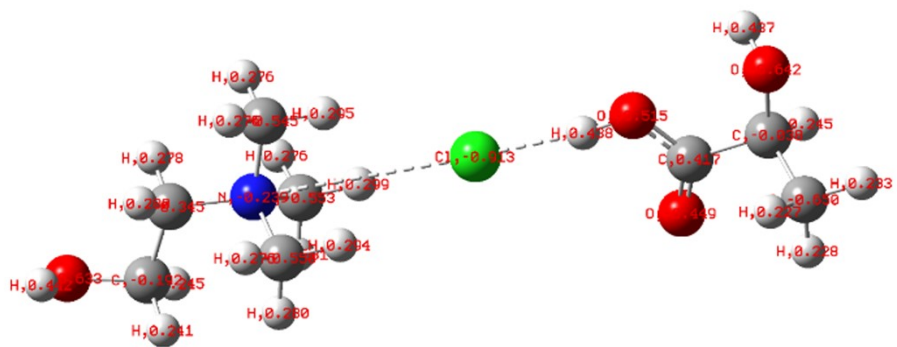



**Choline Chloride - Lactic acid - Au(S<sub>2</sub>O<sub>3</sub>)<sub>2</sub><sup>3-</sup>**

0 1

|    |             |             |             |
|----|-------------|-------------|-------------|
| Au | 0.29020800  | -1.27931300 | 0.19472100  |
| S  | 3.16735000  | -2.53542000 | -1.27338600 |
| S  | -3.17480100 | -1.43978400 | 0.20442500  |
| S  | 2.22747700  | -2.53163000 | 0.63843900  |
| S  | -1.64805000 | -0.00176200 | -0.16961000 |
| O  | -3.01381100 | -2.56329200 | -0.76447000 |
| O  | -3.04719600 | -1.90033000 | 1.61924200  |
| C  | 2.25332435  | 5.04423956  | -3.36165004 |
| C  | 3.12735451  | 4.52351635  | -2.22342952 |
| N  | 3.92050755  | 3.27224602  | -2.52270990 |
| C  | 4.74770454  | 2.95017274  | -1.31298414 |
| O  | 1.61204011  | 6.24060220  | -2.92069828 |
| C  | 4.84133739  | 3.48214691  | -3.68933480 |
| C  | 3.01001074  | 2.11497241  | -2.80614989 |
| H  | 2.85221900  | 5.32610745  | -4.22641125 |
| H  | 1.51122553  | 4.30707272  | -3.67679544 |
| H  | 3.84978522  | 5.28918921  | -1.94425935 |
| H  | 2.50668716  | 4.29282315  | -1.35695645 |
| H  | 5.33358560  | 2.05893644  | -1.52229080 |
| H  | 5.40489320  | 3.79218424  | -1.10812162 |
| H  | 4.08017476  | 2.77916750  | -0.47161563 |
| H  | 0.95231296  | 6.00082416  | -2.25810101 |
| H  | 4.25596695  | 3.62779176  | -4.59221055 |
| H  | 5.45645927  | 4.35655016  | -3.48858986 |
| H  | 5.45891147  | 2.59458970  | -3.79423937 |
| H  | 2.43339080  | 2.32763656  | -3.69848680 |
| H  | 3.61937519  | 1.22865491  | -2.95357954 |
| H  | 2.35017620  | 1.97794708  | -1.95213206 |
| C  | -7.54155183 | -0.40301034 | 6.59016673  |
| C  | -7.65503907 | -0.30151283 | 5.07105562  |
| N  | -6.36315352 | -0.46069225 | 4.29914291  |
| C  | -6.69201402 | -0.38697251 | 2.83570619  |
| O  | -8.84362245 | -0.22328556 | 7.14621540  |
| C  | -5.72503991 | -1.78918144 | 4.58149778  |
| C  | -5.39941374 | 0.64175800  | 4.62878669  |
| H  | -7.21709408 | -1.39539983 | 6.89993079  |
| H  | -6.84535387 | 0.33447927  | 6.99596733  |
| H  | -8.33188985 | -1.07289492 | 4.70649907  |
| H  | -8.05458700 | 0.67497339  | 4.79537724  |
| H  | -5.76985712 | -0.49428947 | 2.27086870  |
| H  | -7.38096153 | -1.19278552 | 2.59383044  |

|   |             |             |             |
|---|-------------|-------------|-------------|
| H | -7.15146331 | 0.57741735  | 2.63165811  |
| H | -9.09393271 | 0.70200369  | 7.03155464  |
| H | -5.38988354 | -1.81746668 | 5.61421130  |
| H | -6.45740164 | -2.57185707 | 4.39697091  |
| H | -4.87309850 | -1.90234422 | 3.91663553  |
| H | -5.09471021 | 0.55769314  | 5.66763651  |
| H | -4.53274412 | 0.53868882  | 3.98111906  |
| H | -5.89343923 | 1.59471182  | 4.45403016  |
| C | -7.80942637 | -5.88214505 | -3.68574930 |
| C | -6.62668749 | -6.68042211 | -3.14497866 |
| N | -5.55875027 | -5.87281357 | -2.44386009 |
| C | -4.51719127 | -6.82732936 | -1.93714717 |
| O | -8.70897451 | -6.79105043 | -4.32004261 |
| C | -6.13740632 | -5.12588929 | -1.27927053 |
| C | -4.90128375 | -4.90961011 | -3.38914338 |
| H | -8.37452524 | -5.41312413 | -2.88163500 |
| H | -7.48948814 | -5.10680599 | -4.38586190 |
| H | -6.98282718 | -7.41540125 | -2.42425266 |
| H | -6.12948174 | -7.20272700 | -3.96287996 |
| H | -3.74977839 | -6.25677344 | -1.42119851 |
| H | -4.98905406 | -7.52783756 | -1.25318068 |
| H | -4.09174781 | -7.35691650 | -2.78657105 |
| H | -8.29743817 | -7.10118042 | -5.13649595 |
| H | -6.81467553 | -4.35917157 | -1.64387142 |
| H | -6.66999034 | -5.83186178 | -0.64638794 |
| H | -5.32202198 | -4.67078498 | -0.72266264 |
| H | -5.62523525 | -4.16671520 | -3.70861567 |
| H | -4.07870297 | -4.43076310 | -2.86622517 |
| H | -4.53051738 | -5.46931963 | -4.24513061 |
| O | -4.44005400 | -0.67248700 | -0.02636100 |
| O | 3.32817800  | -1.11436400 | -1.71227900 |
| O | 4.48260900  | -3.20012900 | -1.02652900 |
| O | 2.31135800  | -3.30908400 | -2.21964100 |
| O | 7.99719703  | -1.18925229 | -4.47894651 |
| C | 7.65498088  | -0.15997842 | -5.26705746 |
| C | 8.66376323  | 0.13202085  | -6.37085018 |
| C | 8.01752262  | -0.10473149 | -7.72942482 |
| O | 9.83273857  | -0.67052673 | -6.29775509 |
| O | 6.63613237  | 0.48289956  | -5.11693989 |
| H | 7.30878127  | -1.30351870 | -3.80249863 |
| H | 8.91622219  | 1.19381976  | -6.26561728 |
| H | 7.11621720  | 0.49900325  | -7.83618770 |
| H | 8.71942497  | 0.16904453  | -8.51871707 |
| H | 7.75321087  | -1.15888867 | -7.84347949 |

|   |             |             |             |
|---|-------------|-------------|-------------|
| H | 10.29126315 | -0.47258454 | -5.47214416 |
| O | -0.21123423 | -0.11047970 | 5.84798128  |
| C | 0.36822061  | 1.09848157  | 5.86472025  |
| C | 0.75188730  | 1.57788410  | 7.25907920  |
| C | 2.26548022  | 1.71813017  | 7.35273346  |
| O | 0.32953705  | 0.70415381  | 8.29548863  |
| O | 0.56919321  | 1.75389697  | 4.86276200  |
| H | -0.42871346 | -0.33689296 | 4.92820163  |
| H | 0.28532502  | 2.56389059  | 7.37015228  |
| H | 2.63740898  | 2.38931338  | 6.57850641  |
| H | 2.53330319  | 2.12517735  | 8.32904587  |
| H | 2.74328044  | 0.74244106  | 7.23502944  |
| H | -0.63465280 | 0.66684191  | 8.29323821  |
| O | -0.57215186 | -6.13204585 | -4.06133263 |
| C | -0.03432914 | -5.19264292 | -4.85247377 |
| C | 0.91223388  | -5.74669558 | -5.90997453 |
| C | 0.34494775  | -5.47406554 | -7.29679209 |
| O | 1.13417853  | -7.14445394 | -5.79621594 |
| O | -0.27650871 | -4.00847381 | -4.73857796 |
| H | -1.15379341 | -5.69708865 | -3.41553069 |
| H | 1.85089748  | -5.19433305 | -5.78335432 |
| H | 0.16476428  | -4.40791652 | -7.43501507 |
| H | 1.05543595  | -5.81135252 | -8.05312963 |
| H | -0.59603139 | -6.01278537 | -7.43264396 |
| H | 1.56339490  | -7.32043722 | -4.95012936 |

|                                              |                             |
|----------------------------------------------|-----------------------------|
| Zero-point correction=                       | 0.915401 (Hartree/Particle) |
| Thermal correction to Energy=                | 0.983845                    |
| Thermal correction to Enthalpy=              | 0.984789                    |
| Thermal correction to Gibbs Free Energy=     | 0.802993                    |
| Sum of electronic and zero-point Energies=   | -4197.815986                |
| Sum of electronic and thermal Energies=      | -4197.747541                |
| Sum of electronic and thermal Enthalpies=    | -4197.746597                |
| Sum of electronic and thermal Free Energies= | -4197.928393                |

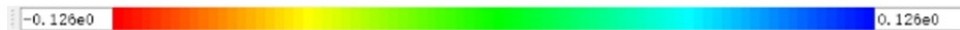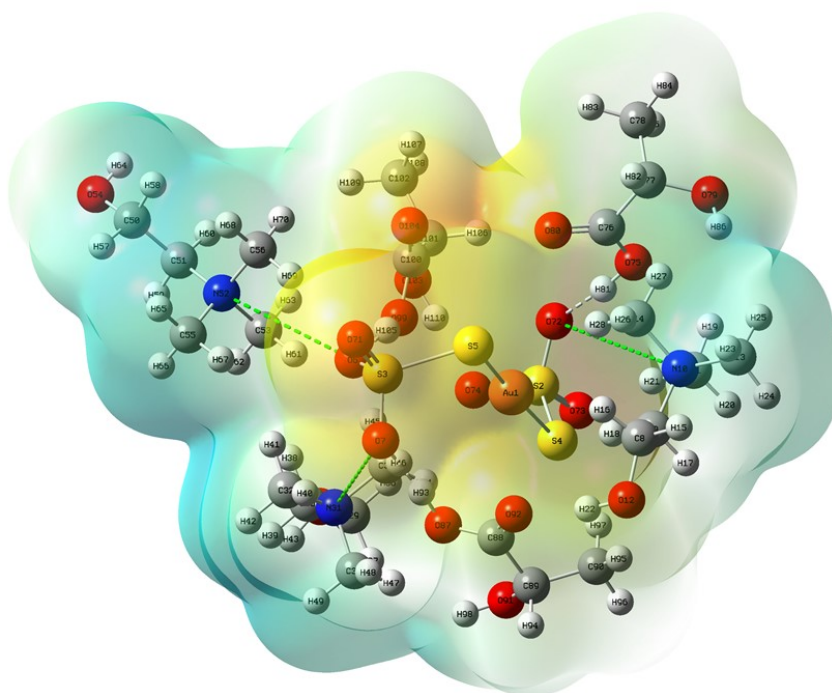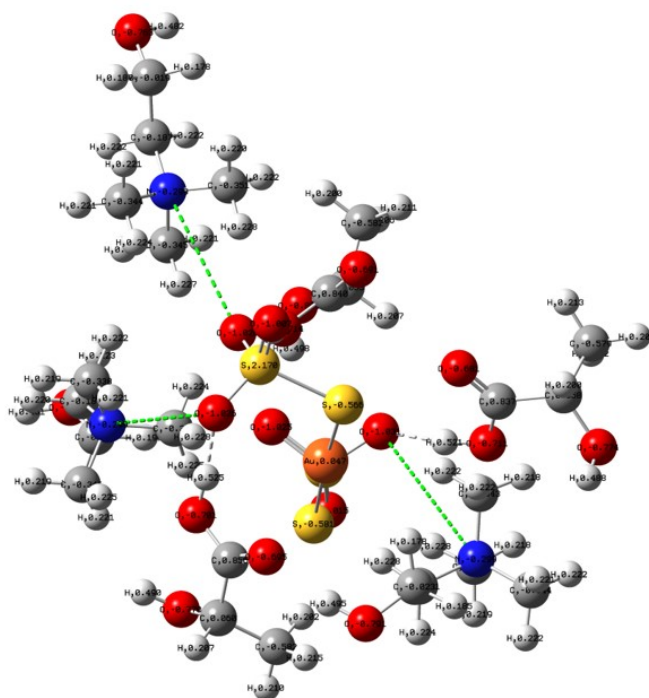

## Reference

1. M. Shyama and S. Lakshmipathi, *Journal of Molecular Liquids*, 2020, **304**, 112720.
2. D. J. G. P. van Osch, L. F. Zubeir, A. van den Bruinhorst, M. A. A. Rocha and M. C. Kroon, *Green Chemistry*, 2015, **17**, 4518-4521.
3. H. Yu, F. Zi, X. Hu, Y. Nie, P. Xiang, J. Xu and H. Chi, *Hydrometallurgy*, 2015, **154**, 111-117.
4. S. Wu, Y. Ke, J. Tang, X. Lei, H. Deng and Z. Lin, *Surfaces and Interfaces*, 2022, **30**, 101869.
5. Q. Luo, M. Zhang, J. M. Liu, Z. W. Li, Y. Y. Hu, Y. H. Yin, X. B. Liu, Y. S. Li and Z. P. Wu, *Electrochimica Acta*, 2022, **413**, 140178.
6. N. Gao, Y. Zhang, C. Chen, B. Li, W. Li, H. Lu, L. Yu, S. Zheng and B. Wang, *Journal of Materials Chemistry A*, 2022, **10**, 8378-8389.
7. J. Xu, S. An, X. Song, Y. Cao, N. Wang, X. Qiu, Y. Zhang, J. Chen, X. Duan, J. Huang, W. Li and Y. Wang, *Advanced Materials*, 2021, **33**, 2105178.
8. G. Wen, X. Zhang, Y. Sui, K. Rao, J. Liu, S. Zhong and L. Wu, *Chemical Engineering Journal*, 2022, **430**, 133041.
9. X. Bai, X. Wang, T. Jia, L. Guo, D. Hao, Z. Zhang, L. Wu, X. Zhang, H. Yang, Y. Gong, J. Li and H. Li, *Applied Catalysis B: Environmental*, 2022, **310**, 121302.
10. S. B. Dhanalekshmi, R. Priya, K. Tamizh Selvi, K. Alamelu Mangai, G. K. Weldegebrerial, S. Garg and S. Sagadevan, *Inorganic Chemistry Communications*, 2021, **131**, 108768.
11. C. Tian, B. Li, X. Hu, J. Wu, P. Li, X. Xiang, X. Zu and S. Li, *ACS Applied Materials & Interfaces*, 2021, **13**, 6229-6240.
12. H. Li, S. Chen, X. Jia, B. Xu, H. Lin, H. Yang, L. Song and X. Wang, *Nature Communications*, 2017, **8**, 15377.
13. Z. Feng, P. Yang, G. Wen, H. Li, Y. Liu and X. Zhao, *Applied Surface Science*, 2020, **502**, 144129.
14. G. Nagaraju, C. N. Tharamani, G. T. Chandrappa and J. Livage, *Nanoscale Research Letters*, 2007, **2**, 461.
15. Y. Gao, C. Chen, X. Tan, H. Xu and K. Zhu, *Journal of Colloid and Interface Science*, 2016, **476**, 62-70.
16. E. Ghaleghafi and M. B. Rahmani, *Physica E: Low-dimensional Systems and Nanostructures*, 2022, **138**, 115128.
17. S. Krithika and J. Balavijayalakshmi, *Materials Today: Proceedings*, 2022, **50**, 17-25.
18. S. Zeng, F. Jia, B. Yang and S. Song, *Hydrometallurgy*, 2020, **195**, 105369.
19. M. Mousavi, A. Habibi-Yangjeh and M. Abitorabi, *Journal of Colloid and Interface Science*, 2016, **480**, 218-231.
20. R. G. Pearson, *Inorganic Chemistry*, 1988, **27**, 734-740.
21. S. Mohammadnejad, J. L. Provis and J. S. J. van Deventer, *Computational and Theoretical Chemistry*, 2017, **1101**, 113-121.
22. R. A. Bryce, J. M. Charnock, R. A. D. Patrick and A. R. Lennie, *The Journal of Physical Chemistry A*, 2003, **107**, 2516-2523.
23. T. Lu and F. Chen, *Journal of computational chemistry*, 2012, **33**, 580-592.
